# Supplementary material for: Geo-Temporal Signatures of Physicochemical and Heavy Metals Pollution in Groundwater of Khulais Region—Makkah Province, Saudi Arabia
Source: Frontiers journal article supplement (doi:10.3389/fenvs.2021.800517), 2022-01-11
Supplement: Data_Sheet_1.docx [file Data_Sheet_1.docx]

**Figure S1** Saudi Arabia’s drinking water consumption within different periods.

**Figure S2** Geologic map after Ramsay 1986.

**Figure S3** Geoelctric resistivity cross section (see Figure 1a sites) of the aquifer

(modified after Gabr et al. 2017).

**Figure S4** Rainfall within different periods in Jeddah station (World Weather Online) .

**Figure** **S5** Correlation among various parameters in aquifer.

**Figure S6** Classification of soil texture depend on Folk (1980).


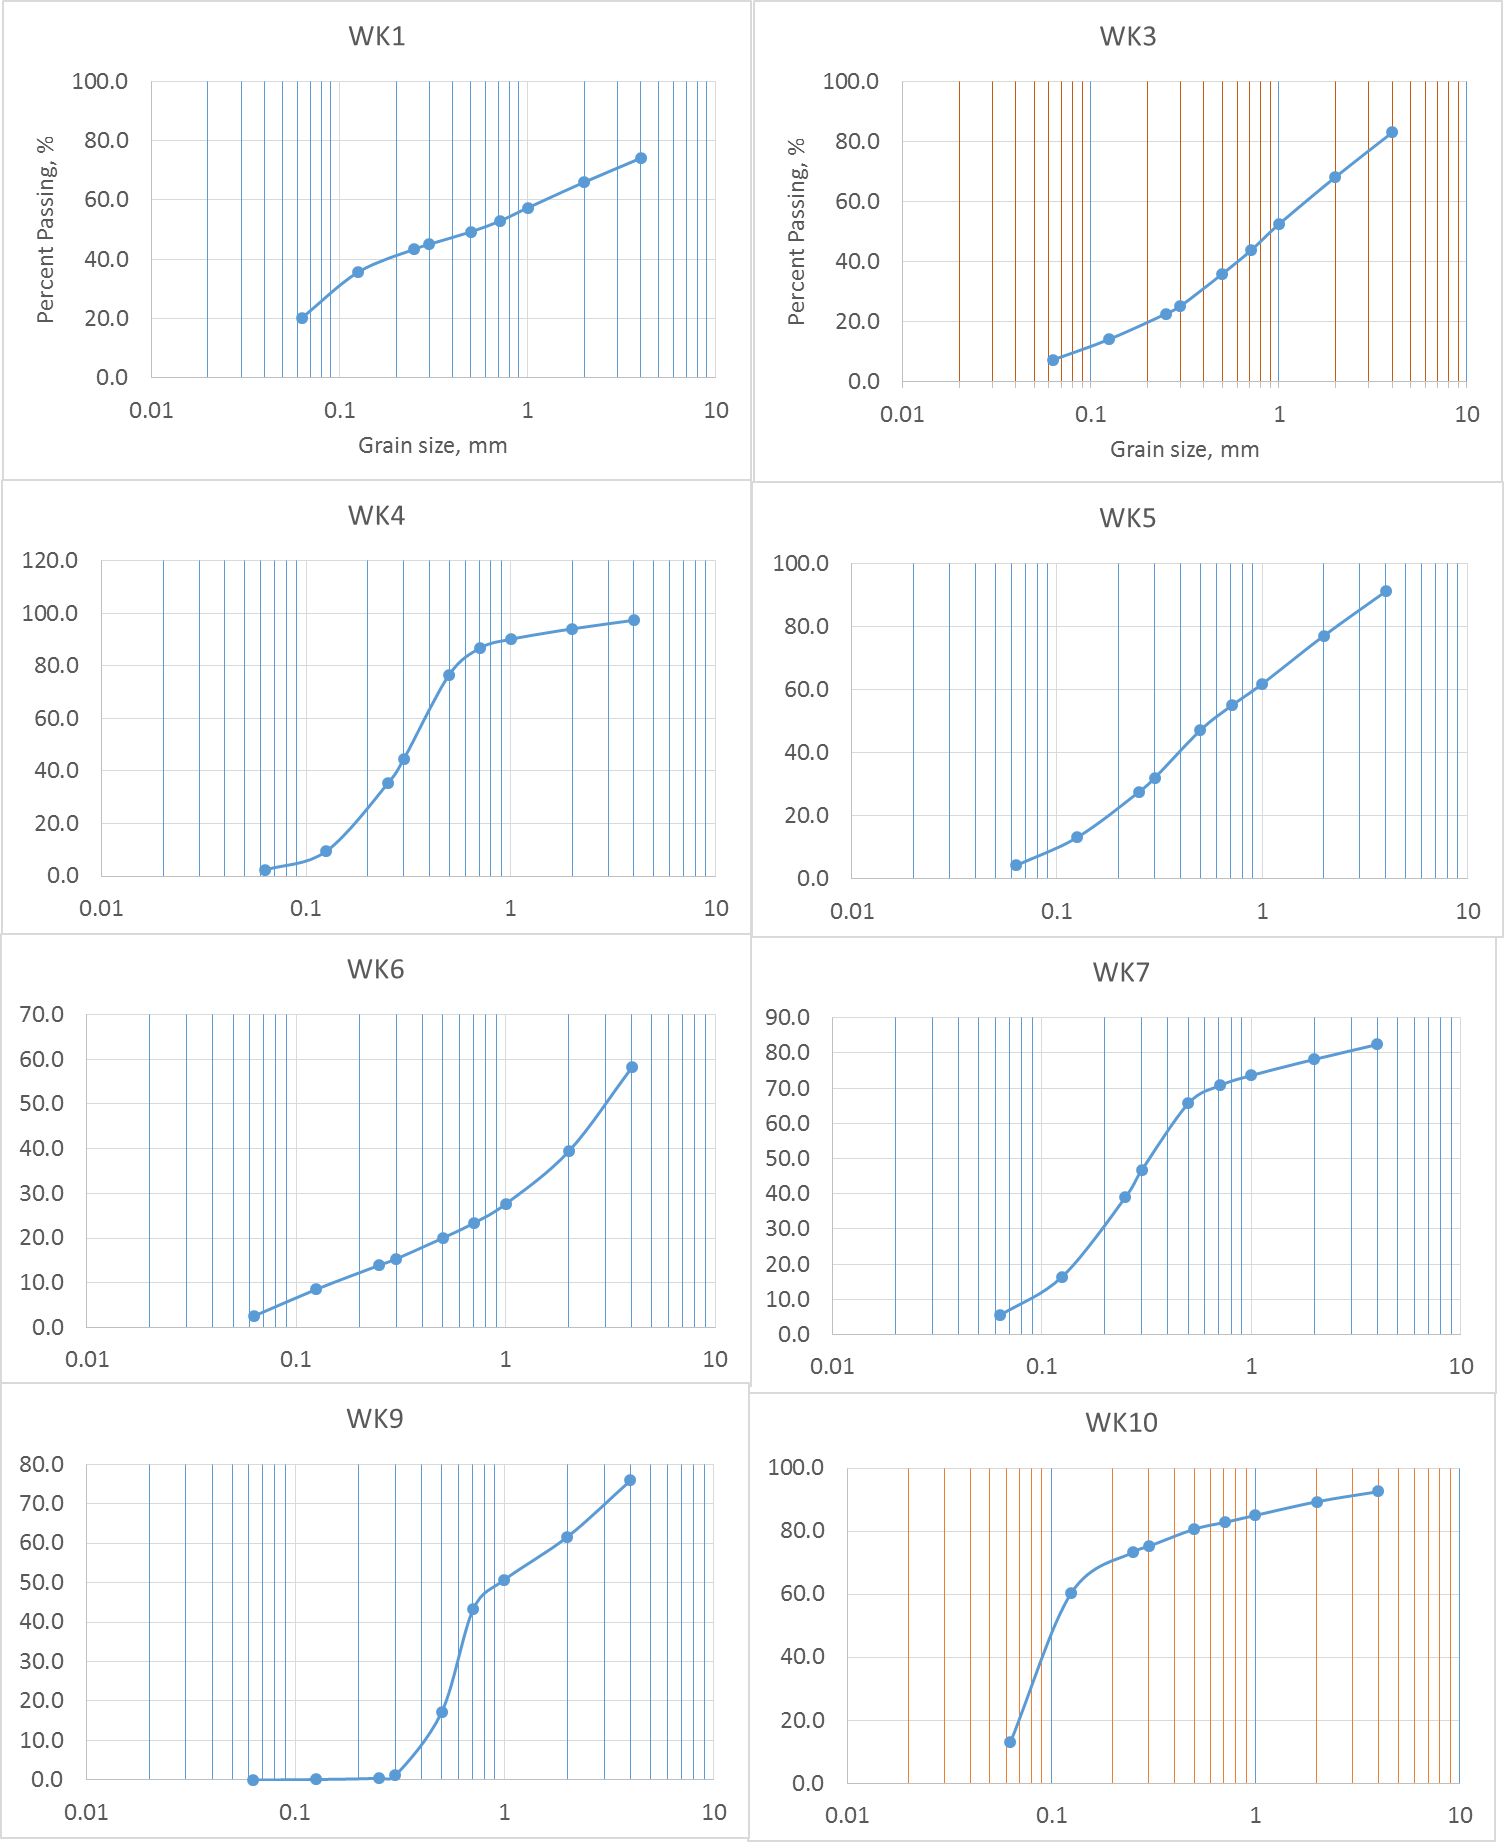


**Figure S7** Grain size curves of selected soil samples.


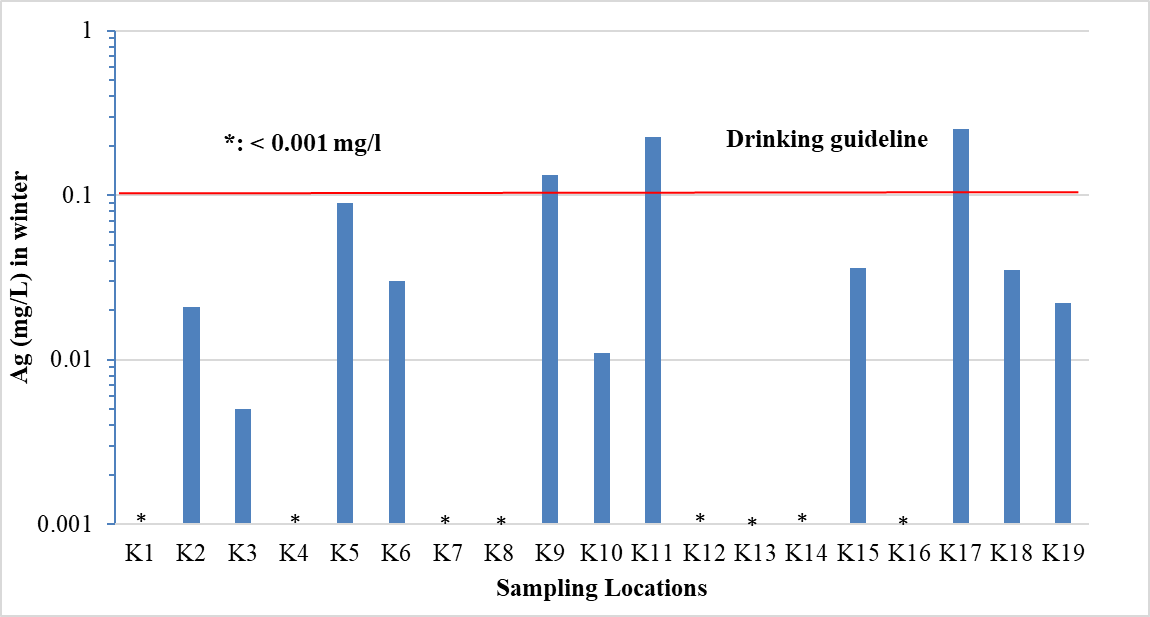


**Figure S8** Ag concentration in groundwater during winter season.

**Figure S9** Irrigation waters by USSL (Richards 1954) diagrams of groundwater.

**Table S1** Lineaments lengths of the study area

| **Statistics** | **Lineaments lengths (m)** |
| --- | --- |
| **Count** | 2136 |
| **Minimum** | 0.1 |
| **Maximum** | 2576.5 |
| **Sum** | 1262497.8 |
| **Mean** | 591.1 |
| **Standard Deviation** | 344.7 |

**Table S2** Statistics of the stream orders

| **Total area in Figure 6c (Total length of the streams = 9626839 m)** | | | | | | |  |
| --- | --- | --- | --- | --- | --- | --- | --- |
| **Statistics/Stream order** | **1** | **2** | **3** | **4** | **5** | **6** | **7** |
| **Count:** | 6367 | 2987 | 1432 | 767 | 408 | 463 | 59 |
| **Minimum:** | 13.1 | 2.1 | 29.8 | 0.8 | 0.6 | 26.6 | 42.1 |
| **Maximum:** | 11137.4 | 9287.2 | 8383.2 | 9830.2 | 6460.9 | 9579.9 | 3209.7 |
| **Sum:** | 4846360.9 | 2375205.8 | 1121155.3 | 588098.5 | 286259.7 | 355889.4 | 53868.9 |
| **Mean:** | 761.2 | 795.2 | 782.9 | 766.8 | 701.6 | 768.7 | 913 |
| **Standard Deviation:** | 815.1 | 695 | 657 | 776.4 | 628.4 | 847.9 | 730.6 |
| **Study area in Figure 6c (Total length of the streams = 2428197.1 m)** | | | | | | |  |
| **Statistics/Stream order** | **1** | **2** | **3** | **4** | **5** | **6** |  |
| **Count:** | 1584 | 715 | 408 | 200 | 93 | 197 |  |
| **Minimum:** | 19.4 | 7.7 | 12.7 | 29.8 | 42.1 | 1.7 |  |
| **Maximum:** | 5652.1 | 5735.4 | 3659.5 | 4435.2 | 6460.9 | 3476 |  |
| **Sum:** | 1128075.7 | 618692.1 | 316497.8 | 151883.7 | 75904.9 | 137142.9 |  |
| **Mean:** | 712.2 | 865.3 | 775.7 | 759.4 | 816.2 | 696.2 |  |
| **Standard Deviation:** | 633.1 | 686.2 | 604.4 | 634.5 | 910 | 588.9 |  |

**Table S3** Pearson correlation analysis of the aquifer in summer 2021.

**Table S4** Hydrochemical facies of the groundwater in winter and summer season.

| **Sample ID** | **Water type (Winter season)** | **Water type (Summer season)** |
| --- | --- | --- |
| K1 | Na-Ca-Mg-Cl-SO4-HCO3 | Na-Ca-Mg-Cl-HCO3-SO4 |
| K2 | Ca-Mg-SO4-HCO3-Cl | Ca-Mg-HCO3-SO4-Cl |
| K3 | Na-Mg-Ca-Cl-SO4 | Na-Ca-Mg-Cl-SO4-HCO3 |
| K4 | Na-Ca-Mg-Cl-SO4 | Na-Mg-Ca-Cl-SO4 |
| K5 | Na-Ca-Mg-Cl-SO4 | Na-Mg-Ca-Cl-SO4 |
| K6 | Na-Ca-Mg-Cl-SO4 | Na-Mg-Ca-Cl-SO4 |
| K7 | Na-Ca-Mg-Cl-SO4 | Na-Ca-Cl-SO4 |
| K8 | Na-Ca-Mg-Cl | Na-Ca-Mg-Cl |
| K9 | Ca-Na-Mg-Cl-SO4 | Ca-Na-Mg-Cl-SO4 |
| K10 | Na-Ca-Cl-SO4 | Na-Ca-Mg-Cl |
| K11 | Na-Ca-Cl-SO4 | Na-Ca-Mg-Cl-SO4 |
| K12 | Na-Ca-Cl-SO4 | Na-Ca-Cl-SO4 |
| K13 | Na-Ca-Cl-SO4 | Na-Ca-Cl-SO4 |
| K14 | Na-Ca-Cl-SO4 | Na-Ca-Mg-Cl-SO4 |
| K15 | Na-Ca-Cl-SO4 | Na-Ca-Cl-SO4 |
| K16 | Ca-Na-Cl-SO4 | Na-Ca-Cl-SO4 |
| K17 | Ca-Na-Mg-Cl-SO4 | Ca-Na-Mg-Cl-SO4 |
| K18 | Ca-Na-Mg-Cl-SO4 | Ca-Na-Mg-Cl-SO4 |
| K19 | Na-Ca-Mg-Cl-SO4 | Na-Ca-Mg-Cl-SO4 |

**Table S5** Granulometric analysis outputs of the soil samples.

**Table S6** Guidelines for drinking and irrigation purposes (WHO 2011 and 2017).

| **Elements** | **Drinking guidelines** | **Irrigation guidelines** |
| --- | --- | --- |
| **TDS** | 600 | 2000 |
| **NO3** | 45 (11.3) | _ |
| **Br** | 0.5 | _ |
| **F** | 1.5 | 1 |
| **Al** | 1 | 5 |
| **B** | 2.4 | 0.5 |
| **Cr** | 0.05 | 0.1 |
| **Ni** | 0.02-0.07 | 0.2 |
| **Fe** | 0.3 | 0.2 |
| **Pb** | 0.01 | 2 |
| **Se** | 0.01 | 0.02 |
| **Sr** | 1.5 | _ |
| **Ba** | 0.7 | _ |
| **Cd** | 0.002 | 0.01 |
| **Co** | 2 | 0.05 |
| **Cu** | 2 | 0.2 |
| **Mn** | 0.5 | 0.2 |
| **Zn** | 3 | 2 |
| **Li** | 2.5 | _ |
